# Supplementary material
Source: publisher figshare collection journal article supplement (https://tandf.figshare.com/ndownloader/files/21597567)
Supplement: Supplementary file 1 [file 21597567]

Supplementary material for Zhong Y, et al. MicroRNA expression profile in myocardial bridging patients. Scand J Clin Lab Invest, 2014;74:582-7.

Supplementary data. Differential expressed miRNAs in MB patients compared with controls.

|                 | $\Delta\Delta CT$ | $2^{-\Delta\Delta CT}$ |
|-----------------|-------------------|------------------------|
| hsa-miR-486-3p  | 5.31779           | 0.025071793            |
| hsa-miR-29b     | 5.30575           | 0.025281853            |
| hsa-miR-193a-5p | 4.21708           | 0.053769244            |
| hsa-miR-489     | 2.30727           | 0.202043102            |
| hsa-miR-501     | 2.23794           | 0.21198844             |
| hsa-miR-212     | 2.22353           | 0.214116221            |
| hsa-miR-382     | 2.1667            | 0.22271992             |
| hsa-miR-766     | 2.10992           | 0.231659219            |
| hsa-miR-584     | 1.46993           | 0.360999814            |
| hsa-miR-486     | 1.34296           | 0.394211946            |
| hsa-miR-423-5p  | 1.30757           | 0.404001905            |
| hsa-miR-433     | 1.26488           | 0.416134267            |
| hsa-miR-574-3p  | 1.26217           | 0.416917808            |
| hsa-miR-494     | 1.24935           | 0.420637681            |
| hsa-miR-671-3p  | 1.21172           | 0.431754165            |
| hsa-miR-625     | 1.1347            | 0.455429927            |
| hsa-miR-885-5p  | 0.32352           | 0.79911952             |
| hsa-miR-636     | 0.30542           | 0.809208287            |
| hsa-miR-125a-3p | 0.28664           | 0.819807447            |
| hsa-miR-331     | 0.26157           | 0.834181776            |
| hsa-miR-339-3p  | 0.26037           | 0.834874934            |
| hsa-miR-452     | 0.21822           | 0.859623007            |
| hsa-miR-376c    | 0.19748           | 0.872074323            |
| hsa-miR-432     | 0.18676           | 0.878577769            |
| hsa-miR-720     | 0.15112           | 0.900550384            |
| hsa-miR-520c-3p | 0.0877            | 0.941021832            |
| hsa-miR-572     | 0.08171           | 0.944936966            |
| hsa-miR-516-3p  | 0.07512           | 0.94926645             |
| hsa-miR-1183    | -0.069063         | 1.049035282            |
| hsa-miR-375     | -0.606417         | 1.522472849            |
| hsa-miR-197     | -0.63085          | 1.548476834            |
| hsa-miR-484     | -0.6486           | 1.567645796            |
| hsa-miR-204     | -0.672033         | 1.593316637            |
| hsa-miR-142-5p  | -0.675396         | 1.597035077            |
| hsa-miR-422a    | -0.681903         | 1.604254467            |
| hsa-miR-224     | -0.68276          | 1.60520772             |
| hsa-miR-320     | -0.710264         | 1.636103709            |
| hsa-miR-886-5p  | -0.710833         | 1.636748889            |
| hsa-miR-150     | -0.727379         | 1.655628353            |
| hsa-miR-652     | -0.737177         | 1.66691091             |

Supplementary data. (Continued).

|                 | $\Delta\Delta CT$ | $2^{-\Delta\Delta CT}$ |
|-----------------|-------------------|------------------------|
| hsa-miR-629     | -0.742974         | 1.673622323            |
| hsa-miR-483-5p  | -0.751881         | 1.683986415            |
| hsa-miR-345     | -0.756817         | 1.689758416            |
| hsa-miR-487b    | -0.760045         | 1.693543448            |
| hsa-miR-34b     | -0.817104         | 1.761865752            |
| hsa-miR-629     | -0.8724           | 1.830706099            |
| hsa-miR-1274B   | -0.892761         | 1.856726437            |
| hsa-miR-1271    | -0.894107         | 1.858459179            |
| hsa-miR-206     | -0.89556          | 1.860331856            |
| hsa-miR-664     | -0.920195         | 1.892370531            |
| hsa-miR-1233    | -0.95228          | 1.934928156            |
| hsa-miR-769-5p  | -0.95253          | 1.935263483            |
| hsa-miR-1227    | -1.043765         | 2.061600797            |
| hsa-miR-363     | -1.584251         | 2.998520841            |
| hsa-miR-193b    | -1.61717          | 3.067727422            |
| hsa-miR-328     | -1.626081         | 3.086734505            |
| hsa-miR-145     | -1.637613         | 3.111506586            |
| hsa-miR-425-5p  | -1.643047         | 3.12324841             |
| hsa-miR-485-3p  | -1.643642         | 3.124536081            |
| hsa-miR-95      | -1.651423         | 3.141433412            |
| hsa-miR-99a     | -1.651875         | 3.142417785            |
| hsa-miR-342-3p  | -1.654959         | 3.149141785            |
| hsa-miR-139-5p  | -1.656181         | 3.151811381            |
| hsa-miR-133a    | -1.657684         | 3.155096869            |
| hsa-miR-192     | -1.661774         | 3.164052855            |
| hsa-miR-223     | -1.669777         | 3.181654103            |
| hsa-miR-590-5p  | -1.671364         | 3.185155926            |
| hsa-miR-125a-5p | -1.675541         | 3.194391194            |
| hsa-miR-92a     | -1.679127         | 3.202340532            |
| hsa-miR-642     | -1.68084          | 3.206144614            |
| hsa-miR-26a     | -1.681448         | 3.207497187            |
| hsa-miR-128a    | -1.683161         | 3.211307906            |
| hsa-miR-30c     | -1.685278         | 3.216023615            |
| hsa-miR-155     | -1.694586         | 3.236839431            |
| hsa-miR-30b     | -1.6952           | 3.238217747            |
| hsa-miR-99b     | -1.709667         | 3.270853855            |
| hsa-miR-323-3p  | -1.712511         | 3.277307402            |
| hsa-miR-183     | -1.725701         | 3.307406793            |
| hsa-miR-874     | -1.726326         | 3.308841075            |
| hsa-miR-10a     | -1.730269         | 3.317896769            |
| hsa-miR-200b    | -1.730718         | 3.318929536            |
| hsa-miR-139-3p  | -1.732605         | 3.323273432            |
| hsa-miR-616     | -1.733074         | 3.324353958            |
| hsa-miR-539     | -1.733998         | 3.326483782            |

Supplementary data. (Continued).

|                 | $\Delta\Delta CT$ | $2^{-\Delta\Delta CT}$ |
|-----------------|-------------------|------------------------|
| hsa-miR-133b    | -1.745061         | 3.352090269            |
| hsa-miR-1       | -1.747376         | 3.35747347             |
| hsa-miR-196b    | -1.750866         | 3.365605311            |
| hsa-miR-324-5p  | -1.756987         | 3.379915081            |
| hsa-miR-152     | -1.765984         | 3.401058921            |
| hsa-miR-184     | -1.769711         | 3.409856438            |
| hsa-miR-598     | -1.770035         | 3.410622308            |
| hsa-miR-886-3p  | -1.788087         | 3.453566491            |
| hsa-miR-186     | -1.791735         | 3.462309513            |
| hsa-miR-335     | -1.801587         | 3.486034869            |
| hsa-miR-511     | -1.807442         | 3.500210046            |
| hsa-miR-376a    | -1.811638         | 3.510406251            |
| hsa-miR-532     | -1.813641         | 3.515283392            |
| hsa-miR-30a-3p  | -1.869148         | 3.653167744            |
| hsa-miR-1290    | -1.884995         | 3.693515418            |
| hsa-miR-320B    | -1.907987         | 3.752850969            |
| hsa-miR-1274A   | -1.908407         | 3.753944706            |
| hsa-miR-550     | -1.92646          | 3.801213346            |
| hsa-miR-943     | -1.955014         | 3.877196892            |
| hsa-miR-942     | -1.970961         | 3.920290869            |
| hsa-let-7b      | -2.594797         | 6.041041092            |
| hsa-miR-185     | -2.61693          | 6.134432987            |
| hsa-miR-221     | -2.620281         | 6.148699922            |
| hsa-miR-146b    | -2.633697         | 6.206144981            |
| hsa-miR-218     | -2.638907         | 6.228596004            |
| hsa-miR-143     | -2.646067         | 6.259584948            |
| hsa-miR-146a    | -2.655504         | 6.300665319            |
| hsa-miR-532-3p  | -2.663403         | 6.335254164            |
| hsa-miR-122     | -2.667336         | 6.352548699            |
| hsa-miR-29c     | -2.674721         | 6.385152159            |
| hsa-miR-199a-3p | -2.676194         | 6.391672551            |
| hsa-miR-24      | -2.676434         | 6.392736725            |
| hsa-miR-28      | -2.679382         | 6.405814406            |
| hsa-miR-127     | -2.680226         | 6.409560787            |
| hsa-miR-222     | -2.682599         | 6.420114378            |
| hsa-miR-15b     | -2.68463          | 6.429157081            |
| hsa-miR-374     | -2.68802          | 6.444283665            |
| hsa-miR-25      | -2.688984         | 6.448591134            |
| hsa-miR-146b-3p | -2.689087         | 6.449051543            |
| hsa-miR-450b-5p | -2.694335         | 6.472553567            |
| hsa-miR-27a     | -2.694618         | 6.473823352            |
| hsa-miR-26b     | -2.697397         | 6.486305611            |
| hsa-miR-16      | -2.698747         | 6.492376762            |
| hsa-miR-132     | -2.704233         | 6.517113407            |

Supplementary data. (Continued).

|                | $\Delta\Delta CT$ | $2^{-\Delta\Delta CT}$ |
|----------------|-------------------|------------------------|
| hsa-miR-324-3p | -2.706407         | 6.526942818            |
| hsa-miR-31     | -2.707631         | 6.53247863             |
| hsa-miR-411    | -2.71255          | 6.554791996            |
| hsa-miR-660    | -2.712561         | 6.554840611            |
| hsa-miR-27b    | -2.714042         | 6.561574309            |
| hsa-miR-100    | -2.717214         | 6.57601687             |
| hsa-miR-454    | -2.717485         | 6.577252244            |
| hsa-miR-28-3p  | -2.728687         | 6.628522367            |
| hsa-miR-214    | -2.73272          | 6.647076695            |
| hsa-miR-142-3p | -2.733107         | 6.648859999            |
| hsa-miR-195    | -2.73634          | 6.663776434            |
| hsa-miR-410    | -2.79102          | 6.921189472            |
| hsa-miR-296    | -2.802577         | 6.976855723            |
| hsa-miR-744    | -2.833619         | 7.128599156            |
| hsa-miR-1270   | -2.870627         | 7.313829526            |
| hsa-miR-30a-5p | -2.875775         | 7.339971697            |
| hsa-miR-1300   | -2.876526         | 7.343796085            |
| hsa-miR-1254   | -2.885638         | 7.390325972            |
| hsa-miR-543    | -2.887959         | 7.402225057            |
| hsa-miR-628-3p | -2.894654         | 7.43665374             |
| hsa-miR-1255B  | -2.897061         | 7.449073514            |
| hsa-miR-409-3p | -2.90189          | 7.474047849            |
| hsa-miR-30d    | -2.902264         | 7.475985651            |
| hsa-miR-30e-3p | -2.906157         | 7.496187296            |
| hsa-miR-151-5p | -2.9223           | 7.580538306            |
| hsa-miR-589    | -2.928966         | 7.615643788            |
| hsa-miR-1262   | -2.940478         | 7.676655996            |
| hsa-miR-1291   | -2.945011         | 7.70081426             |
| hsa-miR-194    | -2.994471         | 7.969399388            |
| hsa-miR-20b    | -3.674733         | 12.77040611            |
| hsa-miR-106b   | -3.676518         | 12.7862163             |
| hsa-miR-140-3p | -3.677727         | 12.79694027            |
| hsa-miR-125b   | -3.684792         | 12.85975899            |
| hsa-miR-361    | -3.697728         | 12.97558789            |
| hsa-miR-523    | -3.699132         | 12.9882216             |
| hsa-miR-29a    | -3.699957         | 12.995651              |
| hsa-miR-216b   | -3.700401         | 12.99965112            |
| hsa-miR-181a   | -3.701035         | 13.00536514            |
| hsa-miR-19a    | -3.711252         | 13.09779181            |
| hsa-miR-20a    | -3.715061         | 13.13242464            |
| hsa-miR-106a   | -3.716208         | 13.14286184            |
| hsa-miR-18a    | -3.727847         | 13.2493254             |
| hsa-miR-17     | -3.73045          | 13.27324892            |
| hsa-miR-149    | -3.732671         | 13.29370187            |

Supplementary data. (Continued).

|                | $\Delta\Delta CT$ | $2^{-\Delta\Delta CT}$ |
|----------------|-------------------|------------------------|
| hsa-miR-365    | -3.734373         | 13.30939419            |
| hsa-miR-19b    | -3.739325         | 13.35515209            |
| hsa-miR-200c   | -3.782639         | 13.76219323            |
| hsa-miR-1180   | -3.868313         | 14.60421998            |
| hsa-miR-378    | -3.914666         | 15.08105551            |
| hsa-miR-151-3P | -5.080967         | 33.84725661            |
| hsa-miR-148b   | -5.756191         | 54.0488119             |
| hsa-miR-202    | -5.763948         | 54.34020112            |
| hsa-miR-628-5p | -5.793519         | 55.46550857            |
| hsa-miR-331-5p | -5.829012         | 56.84697201            |
| hsa-miR-550    | -5.888455         | 59.2381631             |
| hsa-miR-21     | -6.638052         | 99.59848552            |
| hsa-miR-126    | -6.679895         | 102.5295032            |
| hsa-miR-939    | -6.923897         | 121.4229231            |
| hsa-miR-650    | -8.836629         | 457.1833331            |
| hsa-miR-216a   | -9.756179         | 864.7737974            |
| hsa-miR-367    | -10.87581         | 1879.084202            |
| hsa-miR-147    | -10.96554         | 1999.666922            |
| hsa-miR-503-3p | -11.77075         | 3494.201279            |
| hsa-miR-302b   | -11.80005         | 3565.908577            |
| hsa-miR-645    | -11.93705         | 3921.117068            |
| hsa-miR-492    | -12.64207         | 6392.06782             |
| hsa-miR-330-5p | -12.8068          | 7165.248378            |
| hsa-miR-188-3p | -12.81504         | 7206.260053            |
